1 ***In vivo* two-photon imaging and parasympathetic**  
2 **neuromodulation of pancreatic microvascular dynamics in rats**

3 Joseph S. Canzano<sup>1</sup>, Narayan Subramanian<sup>1</sup>, Rebeca Castro<sup>1</sup>, Abdurahman  
4 Siddiqi<sup>1</sup>, Karim G. Oweiss<sup>1,2,3,4\*</sup>

5 <sup>1</sup> *College of Medicine, University of Florida, Gainesville, FL, USA*

6 <sup>2</sup> *Department of Electrical and Computer Engineering, University of Florida, Gainesville,*  
7 *FL, USA*

8 <sup>3</sup> *J. Crayton Pruitt Family Department of Biomedical Engineering, University of Florida,*  
9 *Gainesville, FL, USA*

10 <sup>4</sup> *Department of Neuroscience, University of Florida, Gainesville, FL, USA*

11

12 **\*Correspondence:** Karim Oweiss, [koweiss@ufl.edu](mailto:koweiss@ufl.edu)

13 **Abstract**

14           The pancreas has long been known to be densely innervated with parasympathetic,  
15 sympathetic, and visceral afferent fibers that are believed to exert significant influence on  
16 local endocrine activity and vascular function. Yet the extent to which these interactions  
17 depend on neurovascular dynamics in the normal and pathological states remain largely  
18 unknown. Herein we describe a new method for high resolution functional imaging of the  
19 rat pancreas *in vivo*. The method comprises a number of elements: a stability-optimized  
20 preparation in dorsal recumbency immobilizing several square centimeters of intact  
21 pancreas for upright fluorescent imaging while leaving access for concurrent manipulation  
22 of abdominal nerves, a full-frame two-photon imaging protocol and analysis pipeline  
23 supporting high-throughput (100+) monitoring of islet and acinar microvessel diameter  
24 dynamics simultaneously, and a first adaptation of random-access linescan imaging to the  
25 pancreas capable of tracking internal blood flow speeds up to 5 mm/s at 20 Hz across  
26 multiple microvessels. These methods were then deployed in concert to characterize the  
27 capacity of parasympathetic fibers to modulate pancreatic microvascular dynamics with  
28 compartment specificity. Electrical stimulation was repeatedly applied to the abdominal  
29 vagal trunks at various current magnitudes while imaging islet and acinar microvascular  
30 populations in the pancreas. Vagal stimulation consistently elicited increases in both islet  
31 and acinar capillary population motility in a current-dependent manner, with only acinar  
32 responsive vessels trending toward dilation. Further, we found vagal stimulation to  
33 profoundly and reversibly disrupt all traces of fast-wave vasomotor oscillation across a  
34 lobular arteriole-venule pair, and this was associated with a significant increase in average

35 flow speed. Together, these findings add to mounting evidence that vagal projections exert  
36 tangible reversible influence on pancreatic microvascular activity and underscore the  
37 potential for new neuromodulation-based strategies to address diabetes, pancreatitis, or  
38 other diseases of the pancreas under autonomic nervous influence.

39

## 40 **Introduction**

41       The pancreatic Islet of Langerhans is a highly complex signaling environment.  
42 Comprised of neuroendocrine cells, projections from all arms of the peripheral nervous  
43 system, and the various cellular constituents in a highly specialized capillary plexus,  
44 competing influences ultimately culminate in secretory activity to precisely control blood  
45 glucose. While direct interactions between peripheral axons and  $\beta$  or  $\alpha$  cells through non-  
46 classical synapses have been described in rodents, no analogous structural connectivity has  
47 yet been demonstrated in humans<sup>1-3</sup>. Contemporary theory therefore suggests that nervous  
48 control of islet secretion principally occurs indirectly through modulating islet blood flow  
49 via contractile activity among islet pericytes and arteriolar smooth muscle cells<sup>4-6</sup>.  
50 Neurovascular studies are therefore of utmost importance to uncover the basic principles of  
51 neuro-insular dynamics, and to develop neuromodulation-based therapies to address  
52 diseases of the islet such as diabetes.

53       Unfortunately, these studies are not commonplace due to the exceptional difficulties  
54 associated with the thorough examination of islet neurovascular interactions in their natural  
55 microenvironment. In particular, the pancreas is a soft abdominal organ filled with

56 digestive fluid, subjected to movements of the diaphragm, and mechanically bonded via  
57 connective and vascular tissue to neighboring organs including spleen, stomach, duodenum,  
58 intestine, and liver. Consequently, most functional studies of pancreatic microvascular or  
59 related neural processes are either carried out *in vitro*<sup>7</sup>, *ex situ*<sup>8</sup>, or *ex vivo*<sup>9,10</sup>. In limited  
60 cases *in vivo* pancreatic imaging has been described in mice, but this has been done in a  
61 setup where limited access to abdominal nervous structures was available, and the  
62 compatibility of these approaches have not been demonstrated in studies involving  
63 autonomic control or neurovascular activity<sup>11-13</sup>.

64         Herein we set out to develop a surgical preparation for upright, intravital imaging of  
65 pancreatic microvascular dynamics in rats with sub-capillary resolution, tailor-made for  
66 neurovascular studies by providing access to surrounding abdominal structures. Two-  
67 photon laser scanning microscopy (TPLSM) was chosen as the ideal imaging modality for  
68 its high resolution and superior signal to noise ratio *in vivo*<sup>14</sup>, and a series of experiments  
69 were then performed to verify that these combined techniques enable thorough  
70 characterization of various pancreatic microvascular responses to parasympathetic  
71 activation. The abdominal vagal trunks were chosen as a parasympathetic target as their  
72 connectivity to and within the pancreas is well described in rodents<sup>1,4,15</sup>, the abdominal  
73 locus is expected to avoid confounding effects on cardiac and respiratory activity<sup>16</sup>, and  
74 vagal stimulation is currently undergoing clinical development for humans as a treatment  
75 for obesity<sup>17</sup>, making its potential impact on understanding digestive organ physiology  
76 highly valuable. By simultaneously examining diameter changes among acinar and islet  
77 capillary populations, as well as internal flow speed dynamics across terminal microvessels,



78 we found numerous distinct and unexpected functional responses to vagal stimulation. We  
79 believe that the detailed methods and analytical tools provided herein will spark greater  
80 interest and further guidance to the study of pancreatic function *in vivo*.

81

## 82 **Results**

### 83 *Two-Photon Imaging of Pancreatic Microvessel Networks at Sub-Capillary Resolution*

84 The functional requirements for the preparation and imaging parameters were first  
85 determined in order to meet the described goals. First, as pancreatic capillaries can be as  
86 small as 4  $\mu\text{m}$  in diameter, the sample must be stabilized on the scale of nearly single  
87 microns to avoid uncorrectable movements in the axial (z) direction. To minimize impact to  
88 normal vascular physiology, the pancreas must be exteriorized and mechanically stabilized  
89 without any compression, stretching, drying, or cooling, and maintained at the same  
90 elevation relative to the heart, all while attached to an anesthetized animal in dorsal  
91 recumbency to leave access to abdominal nerves. Targeting of individual nerves or  
92 catheterization of small blood vessels requires the use of a surgical microscope, so ideally  
93 sensitive surgical steps would be performed outside the physical constraints of the typical  
94 upright two-photon imaging stage before imaging.

95 The developed procedure meeting these requirements is illustrated in Figure 1A-B.  
96 The animal lies on a height-adjustable stage built on a 12" x 12" optical breadboard to  
97 allow the mounting of clamps for tubing and imaging pedestal, while being easily movable  
98 between surgical and imaging stations. Abdominal access is achieved through a T-shaped

99 incision along the linea alba, and the pancreas along with spleen are sparsely adhered to a  
100 temperature-controlled aluminum imaging pedestal inserted to roughly maintain their  
101 original positions. All major blood vessels traversing the pancreas and spleen are left intact  
102 and only connective tissues are dissected (i.e. the gastrosplenic ligature). As the pancreas  
103 shares many immutable mechanical linkages to the stomach and liver it became necessary  
104 to decouple respiratory movements with the anterior abdomen to meet stability goals. A  
105 bilateral pneumothorax is therefore created by a single crosswise incision through the  
106 diaphragm, and breathing is subsequently maintained via tracheostomy and artificial  
107 ventilation. Carefully monitored ventilated animals remain stable for many hours, and due  
108 to the improved displacement of CO<sub>2</sub> from the lungs, diaphragm contractions associated  
109 with inspiratory attempts are eliminated without the need for respiratory paralytics which  
110 could further impact vascular physiology. In addition to the information included in the  
111 online methods section of this manuscript, a detailed step-by-step protocol for this  
112 procedure has been made freely available on protocols.io ([link](#)).

113         If stabilization and mounting are carried out carefully, this procedure provides  
114 upright imaging access to several cm<sup>2</sup> of pancreatic tail with near sub-micron mechanical  
115 stability for several hours. After i.v. injection of a fluorescent tracer such as dextran-FITC,  
116 whole microcapillary networks can be visualized via TPLSM with superb contrast from  
117 parenchyma, including clearly defined erythrocyte shadows flowing within each  
118 microvessel (Figure 1C, Supplemental Video 1). At 1x optical zoom through a 16x Nikon  
119 water-immersion objective providing 800 μm<sup>2</sup> FOV, the microvascular network of near  
120 whole pancreatic lobules can be imaged simultaneously at subcapillary resolution at depths

121 approaching 100  $\mu\text{m}$  before scattering becomes too significant to resolve most capillaries  
122 (Figure S1<sup>a</sup>). Superficial islets are readily located and identified without difficulty by the  
123 unique glomerular characteristics of their capillary beds, and the FOV range at the standard  
124 16x allows large numbers of islet and acinar microvessels to be imaged simultaneously and  
125 analyzed as separate populations (Figure 1D,E). In the acinar space, lobular arterioles and  
126 venules can be found of all sizes, isolated or traversing as pairs (Figure 1C). We also found  
127 that fast-wave vasomotor oscillations, well known to be exhibited by arterioles<sup>18</sup>, can be  
128 readily visualized as a rhythmic, pulsatile narrowing in diameter among these vessels  
129 (discussed in greater detail in the following sections).

130

131 *Stabilized Mounting Facilitates Random-Access Linescan Imaging to Monitor High-Speed*  
132 *Flow Dynamics*

133 Visualizing the flow of erythrocyte shadows makes quantification of internal flow  
134 speeds possible, but it became immediately apparent that many pancreatic microvessels  
135 exhibit internal flow speeds exceeding what can be resolved by full-frame resonant scans.  
136 Notably, this included many islet capillaries and all arterioles, which would be the primary  
137 actuators of interest if the goal is to devise a neuromodulation-based control approach over  
138 compartment-specific microvascular activity. Thus, random-access linescan imaging<sup>19</sup> was  
139 adapted within this preparation to compliment the high-throughput full-frame diameter  
140 measurements with a temporally-advantaged counterpart. In combination with our stability-

---

<sup>a</sup> Likely extendable with the use of red fluorophore dextran conjugates and appropriate excitation source.

141 optimized protocol, this approach readily achieves internal flow speed measurements from  
142 multiple pancreatic microvessels up to 5 mm/s at sampling rates exceeding 20 Hz (Figure  
143 2A-D). Velocity recordings usually have complex time-varying profiles, including  
144 prominent oscillations at frequencies attributable to both cardiac pulsation and vasomotor  
145 oscillation (Figure 2C-F). While not all pancreatic microvessels sized 20-100  $\mu\text{m}$  exhibited  
146 diameter oscillations, flow speed oscillations in the vasomotor frequency range ( $\sim 0.1$ - $0.6$   
147 Hz) were almost always found in linescan recordings, even within capillaries (Figure S2).  
148 Finally, as this imaging modality supports the simultaneous measurement of microvessel  
149 diameter and internal flow speed, correlation and phasic analysis can be performed between  
150 the two variables within and across vessels, though phase ambiguity can be troublesome to  
151 resolve for vessels possessing highly-regular oscillations, in the absence of any disruptive  
152 perturbations (Figure 2E).

153

154 *Vagus Stimulation Elicits Distinct Shifts in Islet and Acinar Capillary Network Diameter*  
155 *Dynamics*

156 A series of experiments were performed to demonstrate the power of these  
157 techniques and provide a first look at how parasympathetic activation may influence  
158 pancreatic microvascular dynamics between compartments. Repeated electrical stimulation  
159 was delivered to the abdominal vagus nerves with varied current amplitude while imaging  
160 the pancreatic microvasculature using the approaches described above: either full-frame  
161 imaging (1024x1024, 15 Hz) to record diameter from a large amount of microvessels

162 simultaneously, or fast linescans (0.8-1.2 KHz) to record internal flow speed and diameter  
163 from select microvessels (Figure 3A). A total of 89 full-frame recordings were collected  
164 from n=2 adult rats, 60 of which including both islet and acinar capillary beds, averaging  
165 32.3 acinar and 43.1 islet microvessels per field-of-view (Figure 3B).

166 Electrical stimulation of the abdominal vagus consistently elicited a significant  
167 transient drop in arterial blood pressure for current amplitudes at or above 2 mA (Figure  
168 3D, 2mA  $p < 0.0001$ , 3mA  $p = 0.0007$  compared to 0 mA control group). Within this range,  
169 higher current led to a shorter vasodilation response latency (Figure 3D,  $p < 0.0001$ ).  
170 Additionally, no significant change from baseline in pulse rate, pulse pressure, or peak  
171 expired pCO<sub>2</sub> were found as a result of stimulation (Figure S3). As vasodilation of  
172 abdominal blood vessels would be expected to decrease the systemic blood pressure (more  
173 vessel area for same fluid volume), these results indicate that the abdominal vagi were  
174 activated as intended, and targeting the abdominal trunks succeeded in avoiding significant  
175 confounding cardiac or respiratory effects.

176 We then sought to examine the full-frame recordings for any effects of vagal  
177 stimulation on islet and/or acinar microvascular dynamics. As registering individual  
178 microvessel segments between trials is difficult (see discussion) an analysis was designed  
179 focusing on metrics that do not require repeated samples from the same population of  
180 vessel segments but could still cover any changes in time-varying diameter activity one  
181 might expect. An overview of the resulting statistical outputs is provided in Figure 3E  
182 featuring the following metrics versus baseline values where applicable: changes in basic

183 diameter population statistics (population mean and SD), the proportion and net movement  
184 direction of “responsive vessels” (defined as those which diameter crossed +/- 4 baseline  
185 standard deviations during stimulation period), changes in fast-wave vasomotor oscillation  
186 power (frequencies 0.3 - 0.6 Hz), changes in the mean correlation between all vessels  
187 (grouped by islet or acinar), and several common metrics capturing shifts in diameter  
188 distributions. All metrics were designed and implemented prior to any data analysis. The  
189 full analysis pipeline including usage documentation has also been made freely available on  
190 protocols.io ([link](#)).

191         As a first exploration of whether meaningful trends exist in the data, the  
192 aforementioned microvascular variables were used to fit generalized linear models  
193 predicting either the stimulation current applied or the magnitude of the vasodilation  
194 response from the ABP recordings. Both of these models were found to have significantly  
195 more predictive power compared to a constant model using either islet (ABP  $p=0.0002$ ,  
196 Stim Amp  $p=0.0032$  vs constant model) or acinar (ABP  $p<0.0001$ , Stim Amp  $p=0.0028$ )  
197 variables, indicating the presence of causal influence of vagal stimulation on microvessel  
198 dynamics in both pancreatic compartments (Figure 3F, Figure S4). As some dynamic  
199 variables were correlated, this process was repeated after performing principal components  
200 analysis to identify decorrelated latent structures in the data most critical for model  
201 performance, the results of which are discussed further in Figure S4.

202         Examining the individual variables led to greater insight into the specific  
203 microvascular dynamics impacted by vagal stimulation (Figure 3G). No significant shift in

204 mean population diameter was found in response to any current amplitudes tested compared  
205 to 0 mA control trials (Fig 3G, column 1). However, a significant increase in diameter  
206 variability was observed over control trials, in both islet and acinar compartments, with the  
207 effect size scaling with current magnitude (Fig 3G, column 2; islet 3mA  $p=0.007$ , acinar  
208 3mA  $p=0.0004$ ). These results indicate that while vagus stimulation induced an increase in  
209 microvessel motility, the net shift in the whole population was not coherent and large  
210 enough to significantly change the mean diameter, a somewhat expected result as a notable  
211 feature of recordings is the high variability of responses between individual capillaries. As  
212 averaging can be lossy, it could be reasoned that a significant and coherent shift among a  
213 subset of “responsive” capillaries may still be present in the data and merely obscured in  
214 the mean by those which do not respond to stimulation. In addition, vessels within the same  
215 compartment could be responding in separate directions based on some unseen subtype  
216 distinction leading to a net zero change. Ultimately, we indeed found a greater proportion  
217 of responsive vessels at high stimulation currents compared to low currents in both islet  
218 ( $p=0.0500$ ) and acinar capillaries ( $p=0.0106$ ; Figure 3G, column 3). Interestingly, the net  
219 shift direction among responsive vessels was toward dilation in only acinar capillary beds  
220 (Kruskal-Wallis  $p=0.0415$ ) whereas islet responsive capillaries showed no directional bias  
221 (Kruskal-Wallis  $p=0.447$ ; Figure 3G, column 4). No stimulation currents tested led to a  
222 significant change in the average correlation between capillaries, global vasomotor  
223 oscillation power, or the overall distribution of diameters among islet or acinar  
224 microvascular networks compared to control trials (Figure S5; one distribution metric  
225 approached significance for acinar). Altogether these results suggest vagal stimulation

226 elicits a significant shift in select diameter dynamics in both islet and acinar microvessel  
227 populations, best characterized as a global increase in capillary motility, but notably a  
228 greater degree of vasodilatory coherence in the acinar response compared to islets.

229

230 *Vagus Stimulation Transiently Disrupts Diameter and Flow Traces of Fast-Wave*

231 *Vasomotion*

232 We also examined microvessel diameter and flow speed signatures of vasomotor  
233 oscillations for dynamic changes associated with vagus stimulation. Several oscillating  
234 microvessels were encountered over the course of this study<sup>b</sup> (Figure 4A, Supplemental  
235 Video 2) and in one representative lobular arteriole-venule pair, both full-frame and  
236 linescan recordings were collected over repeated trials stimulating the abdominal vagus.  
237 Strikingly, vasomotor diameter oscillations exhibited by the putative arteriole could be  
238 consistently and completely eliminated by vagal stimulation (Figure 4B,C). All current  
239 magnitudes at or above 1.5 mA were associated with a significant transient decrease in  
240 diameter oscillation power compared to 0 mA control trials (Figure 4D, horizontal bars  
241 denote  $p < 0.05$  vs 0 mA), effectively increasing the average diameter during stimulation.  
242 Notably, the latency for this vasomotor disruption was consistent with that observed in the  
243 arterial blood pressure response to vagal stimulation discussed earlier (Figure 3D).

---

<sup>b</sup> Oscillating vessels were not encountered in our studies until isoflurane was replaced with urethane as the main anesthetic



244 Simultaneous internal flow speed and diameter measurements from the same  
245 arteriole-venule pair uncovered more vasomotor effects of vagus stimulation (Figure 4E).  
246 First, arteriole flow speed oscillations were also found to be consistently disrupted by vagus  
247 stimulation ( $p=0.0020$ ) leading to an increase in average flow speed within the arteriole  
248 compared to baseline (Figure 4F;  $p=0.0137$ ,  $n=10$ ). As this essentially introduces a  
249 perturbation resolving phase ambiguity, multiple predictions can be made regarding the  
250 relative timing of events within and across these microvessels (and implicitly, flow through  
251 their adjoining capillaries). For example: as expected, paired arteriole and venule flow  
252 speeds were clearly correlated, with changes in venule flow lagging arteriole flow by about  
253 250 ms (Figure 4G, bottom). More importantly, arteriole diameter and flow speed were also  
254 correlated, with diameter lagging internal flow fluctuations by about 600 ms, suggesting  
255 flow oscillations cause diameter oscillations, and not the other way around (Figure 4G,  
256 top). These data support the simple model in Figure 4H in which abdominal vagus nerve  
257 stimulation drives changes in vasomotor dynamics within these microvessels. An  
258 unobserved source of flow oscillations upstream is transiently disrupted by parasympathetic  
259 influence leading to an elimination of arteriole flow oscillations, subsequently eliminating  
260 its diameter oscillations and affecting velocity oscillations observed downstream. Decreases  
261 in flow oscillations are associated with increases in overall flow speed and presumably  
262 greater fluid flux, eventually leading parasympathetic activation to increase overall  
263 perfusion through this microvascular network (as expected within a digestive organ). As  
264 only one representative arteriole-venule pair were used, this model is not expected to  
265 globally describe these phenomena among the entire acinar microvasculature. More

266 appropriately, the model suggests that, for some pancreatic microvascular networks, this  
267 cascade of events can be reliably evoked by vagus stimulation. Furthermore, it serves to  
268 demonstrate the power of the combined techniques in inferring causal links between  
269 microvascular dynamics and neural events within pancreatic tissue *in vivo*.

270

## 271 **Discussion**

272 As knowledge of the interplay between peripheral innervation, vascular actuators,  
273 and pancreatic secretory activity deepens, great need still exists for methods to functionally  
274 interrogate these complex systems *in vivo* without disrupting the native pancreatic  
275 microenvironment. The contributions of the current work towards *in vivo*, intact imaging of  
276 the pancreas in rats are multifold. First, we described a surgical preparation in dorsal  
277 recumbency immobilizing several cm<sup>2</sup> of intact pancreas for upright imaging while leaving  
278 access to sensitive abdominal structures. Second, we developed a full-frame TPLSM  
279 imaging protocol and analysis pipeline supporting the simultaneous monitoring of diameter  
280 dynamics among islet and acinar microvessel populations at sub-capillary resolution. Third,  
281 we adapted random-access linescan imaging to the pancreas achieving simultaneous  
282 tracking of intralaminar flow velocity and vessel diameter from multiple microvessels at  
283 speeds up to 5 mm/s at 20+ Hz. Fourth, we deployed these methods in concert to  
284 functionally characterize compartment-specific pancreatic microvascular responses to  
285 electrical stimulation of the abdominal vagus nerve, yielding specific insights into the  
286 nature of microvessel action within parasympathetic influence.

287           Several existing methods to achieve *in vivo* imaging of either transplanted islets in  
288 the retina or in their original microenvironment have been described<sup>13</sup> and elegantly applied  
289 in studies of immune cell migration<sup>12</sup>, architectural features of the islet capillary plexus<sup>11</sup>  
290 and neurotransmitter modulation of islet pericyte contractility<sup>5</sup>. While the preparation  
291 described here was applied to examine parasympathetic control of pancreatic microvascular  
292 dynamics, it is directly transferrable to functional neurovascular studies entirely within the  
293 islet, which would also benefit from greater ease targeting abdominal nerves, broad optical  
294 access, and a high degree of stability. It remains to be seen the extent to which the full array  
295 of modern optical neuroscience tools such as modern genetically-encoded calcium  
296 indicators<sup>20</sup>, engineered opsins for cellular resolution optogenetic stimulation<sup>21-23</sup>, and/or  
297 targeted ablation<sup>24</sup> could be fully leveraged in the pancreas *in situ*. Rats, while convenient  
298 for interacting with individual branches of peripheral nerves and the complicated celiac  
299 plexus, are disadvantaged models for such studies for the limited genetic toolset, but this  
300 issue is becoming only merely inconvenient as viral methods for transgene expression  
301 improve at a rapid pace<sup>25</sup>. Most noteworthy is the onset of modern engineered adeno-  
302 associated virus (AAV) serotypes capable of widespread peripheral infection with one  
303 intravenous injection<sup>26</sup>, which would be expected to show dramatic improvements in  
304 efficiency compared to older-generation AAV tools that were already sufficient to express  
305 optical labels in pancreatic tissue and even beta-cells *in vivo*<sup>27-29</sup>.

306           While the effects of selective denervation and/or application of neurotransmitters on  
307 islet secretion and perfusion have been well-covered in studies dating back several decades  
308 <sup>1,2,6,30,31</sup>, the potential for peripheral neuromodulation to selectively drive pancreatic activity

309 remains purely theoretical to our knowledge. At the outset of these experiments we chose a  
310 parasympathetic target to test for the interesting possibility of generating compartment-  
311 specific effects, mainly due to the density of parasympathetic projections within murine  
312 islets<sup>4</sup>, their release of the potent vasodilator VIP<sup>32</sup>, and their clear capacity to modulate  
313 islet secretion<sup>1,2,32</sup>. We did ultimately find a distinction between microvascular responses  
314 in the acinar and islet compartments, but at the parameters tested they were surprisingly  
315 subtle: while an increase in capillary motility by multiple measures was observed in both,  
316 the effect sizes were consistently larger in the acinar space, and only the acinar response  
317 approached dilation, in agreement with much evidence describing a more complex  
318 regulatory scheme in the islet capillary plexus<sup>6,33</sup>. More striking was our discovery that  
319 vagal activation eliminated all traces of fast-wave vasomotion in a lobular arteriole-venule  
320 pair, consistent with much evidence that sympathetic tonus underlies this phenomenon<sup>34,35</sup>,  
321 and implicating the same in adjoining capillaries. Vasomotor oscillations are thought to  
322 subserve a variety of microvascular parameters such as flow resistance, capillary flow  
323 stoppage, and tissue oxygenation but the specific physiological roles remain highly debated  
324<sup>18,35,36</sup>, so while functional consequences of these disruptions are likely, more studies are  
325 needed before specific conclusions can be made. Altogether, we believe our current  
326 findings add to the mounting evidence that vagal projections exert enough reversible  
327 influence on pancreatic microvascular activity to warrant further exploration of the  
328 potential for pancreatic neuromodulation to be of therapeutic benefit.

329           For this technology to mature, further characterization of the compartment-wise  
330 microvascular and secretory effects of stimulating pancreatic nerves will be needed.

331 Reasonable next steps for this might include: targeting more local parasympathetic and  
332 sympathetic projections into the pancreas, systematically exploring stimulation parameter  
333 space for each to selectively engage distinct fiber types, and testing the capacity to combine  
334 sympathetic and parasympathetic targeting to exert bidirectional control. We specifically  
335 used long stimulation pulse trains here for maximal effect based on electrophysiological  
336 properties measured from pancreatic neurons and the time course of extended excitatory  
337 post-synaptic potentials<sup>2,9,10</sup> and imaging studies of gastric arteriole vasodilation in  
338 response to vagal stimulation lasting tens of seconds<sup>37</sup>. By cuffing the abdominal vagal  
339 trunks just anterior to the gastroesophageal junction we likely activated all major branches  
340 excluding the hepatic<sup>38,39</sup>, almost certainly causing off-target actuation of non-pancreatic  
341 vasculature, which more local targeting would be expected to avoid. Finally, the  
342 microvascular effects of stimulating various pancreatic nerves must be examined  
343 specifically among the known vascular actuators in and out of the islet, particularly feeding  
344 arterioles and the so-called “insulo-acinar” portal venules<sup>40</sup>. The end goal of these  
345 endeavors would be to build increasingly better models connecting peripheral neural  
346 regulation, pancreatic vascular states, and eventually secretory activity, based on sufficient  
347 functional evidence.

348         While this preparation can achieve highly stable upright pancreatic imaging *in vivo*  
349 in dorsal recumbency, it comes with significant challenges. After eliminating respiratory  
350 movements we were surprised to find two additional mechanical oscillations to be wary of:  
351 pancreas-specific pulsations attributable to frequency of the heart rhythm, and low-  
352 frequency peristaltic movements clearly originating from vascular linkages between the

353 pancreas and small intestine (myoenteric reflex). The former can be reliably resolved with  
354 careful mounting, but if the latter is present it can introduce small shifts of the sample over  
355 prolonged periods (minutes); it is for this reason that precisely registering vessel segments  
356 between recordings can be difficult. Regarding imaging, linescans easily out-sample full-  
357 frame resonant scanning speeds (KHz vs Hz) but are practically limited to only a few  
358 vessels at a time, and importantly, are only feasible on optimally stable preparations if  
359 recording from the smallest pancreatic capillaries. More inroads toward prolonged total  
360 stability could likely be achieved by combining features of our preparation with creative  
361 solutions seen elsewhere, such as vacuum-sealing the coverslip to the sample<sup>41</sup> or optically  
362 compensating for sample drift online<sup>42</sup>. If perfect registration could be achieved, especially  
363 sampling from known pericyte locations<sup>5</sup>, many more analytical approaches from modern  
364 systems neuroscience could be employed to reach stronger conclusions about what dynamic  
365 shifts may be occurring among vessel populations in response to treatments of interest.  
366 Finally, it is worth noting that a Ti:Sapphire laser is not required to image pancreatic tissue  
367 *in vivo* and this preparation can be readily adapted to any upright microscope system given  
368 the physical restraints allow it. Basic microvessel imaging has long been possible using  
369 wide-field systems, and we routinely use epifluorescence to quickly survey for specific  
370 tissue features such as islets. It is our sincere hope that the methods and tools enclosed  
371 inspire and guide others in their own optical studies of pancreatic function *in vivo*.

372

373

374 **Conclusion**

375           Herein we have demonstrated several new techniques supporting *in vivo* studies of  
376 pancreatic function: an acute surgical protocol providing broad optical access to  
377 immobilized pancreas *in situ*, and a collection of complimentary TPLSM imaging strategies  
378 and analysis tools for examining diverse microvascular dynamics from multiple  
379 compartments recorded simultaneously. Using these, we uncovered some first insights into  
380 how parasympathetic projections from the vagus nerve regulate microvascular dynamics  
381 and vasomotion in the pancreas. More broadly, these findings provide further indication of  
382 the potential for neuromodular strategies to address diseases of the pancreas via vascular  
383 control, warranting deeper investigation in the future.

384

385 **Methods**

386 *Animal Usage and Surgical Preparation*

387           All experiments were performed as acute procedures on adult Long-Evans rats and  
388 approved beforehand by the University of Florida IACUC. Throughout surgery and data  
389 collection, animal temperatures were maintained at 37°C with a controlled heating pad and  
390 standard physiological parameters were monitored including rectal temperature, SpO<sub>2</sub>, and  
391 pulse rate (Physiosuite, Kent Scientific), as well as expiry pCO<sub>2</sub> (Surgivet) after  
392 tracheostomy. In addition to the procedure outlined here a full detailed protocol has been  
393 uploaded to protocols.io ([link](#)).

394 Surgeries began by inducing anesthesia with a single injection of urethane i.p. (1.4  
395 g/kg) followed by subcutaneous injections of meloxicam (1.0 mg/kg) for analgesia and  
396 0.9 % saline for hydration. Ventral neck access is provided by a single longitudinal incision  
397 followed by careful implantation of an arterial blood pressure transducer (Transonic)  
398 sutured into the right carotid artery, taking special care to avoid damaging the cervical  
399 vagus nerve. Afterward, a standard tracheostomy is performed and the animal is placed on  
400 mechanical ventilation (Rovent, Harvard Apparatus) maintaining 80-100 bpm and end-tidal  
401 pCO<sub>2</sub> between 20-30 mmHg for the remainder of the procedure (this eliminates the  
402 impulse to manually breathe). After ventilation is stabilized, a laparotomy is performed via  
403 a single T-shaped incision running along the linea alba, providing wide access to the  
404 diaphragm as well as anterior abdominal cavity. A bilateral pneumothorax is carefully  
405 created via a single horizontal incision through the diaphragm to bring the pleural cavity to  
406 atmospheric pressure and eliminate respiratory movements of the thoracic wall. In  
407 experiments including stimulation, the abdominal vagal trunks are accessed by implanting  
408 the esophagus just anterior to the gastroesophageal junction with a custom-made bipolar  
409 stimulation cuff electrode made from silicone tubing and coated platinum wire (4-5 k $\Omega$   
410 impedance). In all cases, stimulation is provided as biphasic pulse trains applied in current-  
411 clamp mode by an isolated neurostimulator (AM Systems). After cuff placement, a mineral  
412 oil/Vaseline mixture is applied for insulation and protection, and proper electrical contact to  
413 the nerves is verified by confirming stimulation (for this test: 3mA current, 800us pulses,  
414 50 Hz, 10 second train) to consistently evoke a transient drop in systemic blood pressure.



415           The pancreas and spleen are then located and clear connective tissues to other  
416 structures (i.e. the gastrosplenic ligature) bluntly dissected while leaving all major vascular  
417 connections intact. An aluminum imaging pedestal maintained at 37°C is carefully  
418 positioned to underlie the entire spleen and 2-3 cm of tail-end pancreas and mechanically  
419 immobilized with a custom assembly of optomechanics posts and clamps (Thorlabs). Organ  
420 and pedestal positioning is fine-tuned until complete mechanical stability of the pancreas is  
421 visually achieved without any stretching, compression, or elevation changes relative to the  
422 heart, and mounting is finalized by sparsely adhering both organs in place with  
423 cyanoacrylate glue (Vetbond). All newly exteriorized abdominal surfaces (excluding the  
424 immediate area to be imaged) are covered in saline-soaked gauze and maintained moist  
425 throughout the remainder of the procedure. One intravenous injection of dextran-FITC  
426 (Sigma, 2 MD) diluted in 0.9 % saline is provided as the vascular contrast agent for  
427 fluorescent imaging.

428

#### 429 *Imaging and Vagal Stimulation Experiments*

430           All *in vivo* imaging was performed with a Bruker Ultima two-photon laser scanning  
431 microscope system through a slightly-underfilled Nikon 16x water-dipping objective.  
432 Imaging access is provided via a coverslip placed directly on the pancreas surface and a  
433 hydrophobic sealant is applied around the perimeter (Vaseline) to support a water column  
434 for imaging. Excitation illumination to visualize dextran-FITC was provided at 940 nm,  
435 average power < 150 mW (Insight Deepsee+, Spectra-Physics) and emission was collected

436 via GaAsP photomultiplier through a 525/70 nm filter. Full-frame videos were collected at  
437 1024 x 1024 resolution as 15 Hz resonant scans, and random-access linescans were  
438 collected via galvo-galvo scans at 0.8 – 1.2 KHz (optimal scan frequency within this range  
439 depends on flow speed vessel-to-vessel in order to avoid over- or under-sampling). During  
440 experiments delivering repeated stimulation trials to the abdominal vagal cuff, imaging,  
441 stimulation triggers, and recording of physiological monitors are all synchronized via the  
442 Bruker Ultima GPIO (PrairieView). Voltage recordings collected in synchrony with  
443 imaging included: arterial blood pressure (sample rate 5 KHz), capnograph pCO<sub>2</sub>  
444 waveform and ETCO<sub>2</sub>, and neurostimulator monitor signal.

445         A total of 89 full-frame recordings with concurrent vagal stimulation were collected  
446 from n=2 adult rats prepared as described, 60 of which including both islet and acinar  
447 regions. Each included 5 seconds of baseline, 10 seconds of stimulation, 20-45 seconds of  
448 post-stimulation recording, and an inter-trial interval of 120 seconds. Stimulation was  
449 delivered as 10 second trains of 800 us biphasic current-clamp pulses at 50 Hz with  
450 currents of 0, 0.5, 1, 1.5, 2, and 3 mA, with order randomized between trials. Full sets  
451 including all stimulation currents in at least quadruple replicate were collected at each FOV  
452 (at least one FOV containing both islet and acinar regions per animal) before moving on.  
453 Linescan recordings were also collected from an acinar arteriole-venule pair with  
454 concurrent stimulation following a similar procedure (n=5 3mA replicates with baseline  
455 periods included in each).

456

457 *Image Processing and Data Analysis*

458           Our processing pipeline for all imaging data collected herein consists of initial  
459 processing steps using custom ImageJ/FIJI <sup>43</sup> scripts to extract raw diameter and/or  
460 directional data (for linescan recordings), followed by subsequent processing by MATLAB  
461 functions, all of which have been made freely available on protocols.io ([link](#)).

462           Full-frame recordings are first registered using the ImageJ plugin Turboreg <sup>44</sup>.  
463 Vessel diameters are measured along a user-defined freehand line directed across all  
464 microvessels perpendicular to their principle axis, which is used to compile a distance vs  
465 time line profile image (similar to Figure 4b). The whole image is thresholded,  
466 morphological filtering is applied to remove holes due to erythrocyte shadows, and the  
467 width of individual vessel columns is measured at all timepoints to extract diameter traces.  
468 When drawing lines for measurement, islet capillary beds are distinguished from acinar as a  
469 spherically oriented plexus of increased capillary density, average diameter, and tortuosity,  
470 with an overall diameter between 75-250  $\mu\text{m}$  (see Figure 1C and Figure 2B for example  
471 islet-acinar boundaries).

472           For linescan recordings, velocity columns (regions of the scanned line sampled  
473 along the principal axis) are divided into 50 millisecond time bins and analyzed via the  
474 ImageJ plugin “Directionality Analysis” to quantify the directional preference within the  
475 input by a Fourier components method <sup>45</sup>. The resulting histograms are then fit with a  
476 gaussian to extract the peak preferred orientation, which is geometrically related to the  
477 instantaneous flow velocity during each time bin. Diameter columns in linescans (line

478 regions scanned perpendicular to vessel principal axis) are analyzed identically to the  
479 process described above starting from line profile images.

480         Once populations of islet and acinar diameter traces have been measured, a panel of  
481 statistical and dynamical variables are calculated per population, per recording (Figure 3E).  
482 For each vessel diameter trace, period averages are calculated and used to calculate %  
483 changes in the population mean and standard deviation during stimulation compared to  
484 baseline values. Vessels exhibiting significant responses to stimulation, defined as any with  
485 diameter values exceeding  $\pm 4$  baseline standard deviations during stimulation, are counted  
486 and reported as a proportion of the whole population. The net direction of change among  $r$   
487 responsive vessels is then calculated as

$$\frac{1}{n} \sum_{j=1}^r I_j \quad I = \begin{cases} +1 & \text{if upper threshold crossed} \\ -1 & \text{if lower threshold crossed} \\ 0 & \text{if both thresholds crossed} \end{cases} \quad Eq. 1$$

488 which is also normalized by the total number of vessels,  $n$ . Spectrograms are computed per  
489 vessel (8 second hamming window, 80% overlap), the average spectrogram is computed  
490 across all vessels, population fast-wave vasomotor power is extracted from this as the  
491 maximum value between 0.3-0.6 Hz at each timepoint, and period average powers are used  
492 to calculate % change from baseline. This window length was required to resolve the  
493 prominent 0.3-0.6 Hz oscillation band from a distinct lower frequency component also  
494 present ( $<0.2$  Hz, visible in Figure 4C). Microvessel spectrograms are only analyzed  
495 individually in the case of Figure 4C, taken from an oscillating arteriole. The average  
496 correlation between all vessels is computed per-period and reported as a difference from

497 baseline. Finally, histograms of diameter distributions are computed per period and the  
498 Euclidean distance, Kolmogorov-Smirnov statistic, and Kullback-Leibler divergence are  
499 computed between the stimulation period and baseline period diameter distributions.

500 For linescan velocity traces, period average values and % change from baseline  
501 were calculated per vessel as described above. Spectrograms were calculated from velocity  
502 data (7 second hamming window, 85% overlap) and used to measure period average  
503 vasomotor band power (0.3-0.6 Hz) per vessel.

504 From physiological data recorded in synchrony with imaging and stimulation, trial  
505 period averages and % changes from baseline were calculated for pulse rate (time between  
506 peaks in ABP), pulse pressure (systolic – diastolic pressure difference from ABP), and end-  
507 tidal pCO<sub>2</sub>. Raw ABP was converted to mean ABP via moving average, and the parameters  
508 of the mean ABP response following stimulation were measured by fitting the stimulation  
509 and post-stimulation periods each with sinusoids of the form

$$\frac{a}{1 + e^{-k(x-d)}} + c \quad \text{Eq. 2}$$

510 Where  $c$  is constrained to the end values of the preceding period and  $x$  is time relative to  
511 period start, thus  $a$  and  $d$  model the amplitude and time constant of the response,  
512 respectively (example fits are depicted in Supplemental Figure 3). Fitted parameters  $a$  and  $d$   
513 during the stimulation period were output for the ABP response amplitude and ABP  
514 response delay, respectively.

515

516 *Statistical Analysis*

517 All statistical analyses were performed in either Graphpad Prism or MATLAB  
518 using per-recording output variables as individual samples unless otherwise stated.  
519 Comparisons between >2 groups were performed by one-way Kruskal-Wallis test with  
520 reported p-values from follow-up multiple comparisons to 0 mA control group with Dunn's  
521 correction. Modeling results in Figure 3F and Supplemental Figure 4 were generated via  
522 multiple linear regression, fitting either the stimulation amplitude or the observed ABP  
523 response amplitude per recording with the following output variables (described above) as  
524 predictors: mean diameter % change, diameter SD % change, proportion responsive  
525 vessels, net responsive direction, mean vasomotor power change, mean diameter  
526 correlation change, and all three diameter distribution change metrics. All regression p-  
527 values were obtained via standard ANOVA versus a constant model. Other tests for  
528 differences used include: Mann-Whitney p-value in Figure 3D right, paired Wilcoxin p-  
529 values in Figure 4F, and the significant ranges in Figure 4D were obtained by multiple t-  
530 tests with Holm-Sidak correction. Differences are considered significant in all cases if  $p <$   
531 0.05.

532

533

534 **Acknowledgements**

535           We owe our gratitude to many for helping bring this work to light. Dr. Rick Johnson  
536 is thanked for much valuable guidance and input involving surgical techniques, peripheral  
537 neuroanatomy and neurophysiology, and for many productive conversations as the project  
538 matured. Dr. Martha Campbell-Thompson is thanked for orchestrating the great  
539 collaborative effort and diverse team from which this work was born, and for expert advice  
540 involving the pancreas. Vicki Dugan is thanked for patient surgical training of multiple  
541 trainees. Dr. Kristina Grove's helpful guidance with the more technical aspects of rodent  
542 surgery, especially ventilation, were key to succeeding with the pneumothorax and  
543 achieving stability goals. Dr. Deo Singh is thanked for his participation and input during  
544 our first steps taken developing the preparation.

545

546 **Author Contributions**

547 KO conceived the study. JC, NS, and RC developed the surgical protocol and contributed  
548 to data collection. JC and KO designed the stimulation experiments and analysis. JC  
549 implemented and carried out the analysis. AS and NS helped with raw data processing. JS  
550 and KO wrote the manuscript.

551

552 **Competing Interests**

553 The authors declare that they have no conflicts of interest with the contents of this article.

554 **References**

- 555 1. Rodriguez-Diaz, R. & Caicedo, A. Neural control of the endocrine pancreas. *Best*  
556 *Pract. Res. Clin. Endocrinol. Metab.* **28**, 745–756 (2014).
- 557 2. Li, W., Yu, G., Liu, Y. & Sha, L. Intrapancreatic Ganglia and Neural Regulation of  
558 Pancreatic Endocrine Secretion. *Front. Neurosci.* **13**, (2019).
- 559 3. Dolensšek, J., Rupnik, M. S. & Stožer, A. Structural similarities and differences between  
560 the human and the mouse pancreas. *Islets* **7**, e1024405 (2015).
- 561 4. Rodriguez-Diaz, R. *et al.* Innervation patterns of autonomic axons in the human  
562 endocrine pancreas. *Cell Metab.* **14**, 45–54 (2011).
- 563 5. Almaça, J., Weitz, J., Rodriguez-Diaz, R., Pereira, E. & Caicedo, A. The Pericyte of the  
564 Pancreatic Islet Regulates Capillary Diameter and Local Blood Flow. *Cell Metab.* **27**,  
565 630-644.e4 (2018).
- 566 6. Pénicaud, L. Autonomic nervous system and pancreatic islet blood flow. *Biochimie*  
567 **143**, 29–32 (2017).
- 568 7. Cohrs, C. M. *et al.* Vessel Network Architecture of Adult Human Islets Promotes  
569 Distinct Cell-Cell Interactions In Situ and Is Altered After Transplantation.  
570 *Endocrinology* **158**, 1373–1385 (2017).
- 571 8. Leibiger, I. B. & Berggren, P.-O. Intraocular in vivo imaging of pancreatic islet cell  
572 physiology/pathology. *Mol. Metab.* **6**, 1002–1009 (2017).
- 573 9. Love, J. A. Electrical properties and synaptic potentials of rabbit pancreatic neurons.  
574 *Auton. Neurosci. Basic Clin.* **84**, 68–77 (2000).



- 575 10. King, B. F., Love, J. A. & Szurszewski, J. H. Intracellular recordings from pancreatic  
576 ganglia of the cat. *J. Physiol.* **419**, 379–403 (1989).
- 577 11. Nyman, L. R. *et al.* Real-time, multidimensional in vivo imaging used to investigate  
578 blood flow in mouse pancreatic islets. *J. Clin. Invest.* **118**, 3790–3797 (2008).
- 579 12. Coppieters, K., Martinic, M. M., Kiosses, W. B., Amirian, N. & Herrath, M. von. A  
580 Novel Technique for the In Vivo Imaging of Autoimmune Diabetes Development in the  
581 Pancreas by Two-Photon Microscopy. *PLOS ONE* **5**, e15732 (2010).
- 582 13. Christoffersson, G. & von Herrath, M. G. A Deeper Look into Type 1 Diabetes -  
583 Imaging Immune Responses during Onset of Disease. *Front. Immunol.* **7**, 313 (2016).
- 584 14. Svoboda, K. & Yasuda, R. Principles of two-photon excitation microscopy and its  
585 applications to neuroscience. *Neuron* **50**, 823–839 (2006).
- 586 15. Berthoud, H. R. & Powley, T. L. Identification of vagal preganglionics that mediate  
587 cephalic phase insulin response. *Am. J. Physiol.-Regul. Integr. Comp. Physiol.* **258**,  
588 R523–R530 (1990).
- 589 16. Payne, S. C. *et al.* Anti-inflammatory Effects of Abdominal Vagus Nerve Stimulation  
590 on Experimental Intestinal Inflammation. *Front. Neurosci.* **13**, 418 (2019).
- 591 17. Guiraud, D. *et al.* Vagus nerve stimulation: state of the art of stimulation and recording  
592 strategies to address autonomic function neuromodulation. *J. Neural Eng.* **13**, 041002  
593 (2016).
- 594 18. Caro, C. G., Pedley, T. J., Schroter, R. C. & Seed, W. A. *The Mechanics of the*  
595 *Circulation*. (Cambridge University Press, 2011). doi:10.1017/CBO9781139013406.

- 596 19. Shih, A. Y. *et al.* Two-photon microscopy as a tool to study blood flow and  
597 neurovascular coupling in the rodent brain. *J. Cereb. Blood Flow Metab. Off. J. Int.*  
598 *Soc. Cereb. Blood Flow Metab.* **32**, 1277–1309 (2012).
- 599 20. Dana, H. *et al.* High-performance calcium sensors for imaging activity in neuronal  
600 populations and microcompartments. *Nat. Methods* **16**, 649–657 (2019).
- 601 21. Marshel, J. H. *et al.* Cortical layer-specific critical dynamics triggering perception.  
602 *Science* **365**, eaaw5202 (2019).
- 603 22. Mardinly, A. R. *et al.* Precise multimodal optical control of neural ensemble activity.  
604 *Nat. Neurosci.* **21**, 881–893 (2018).
- 605 23. Yang, W., Carrillo-Reid, L., Bando, Y., Peterka, D. S. & Yuste, R. Simultaneous two-  
606 photon imaging and two-photon optogenetics of cortical circuits in three dimensions.  
607 *eLife* **7**, e32671 (2018).
- 608 24. Muto, A. & Kawakami, K. Ablation of a Neuronal Population Using a Two-photon  
609 Laser and Its Assessment Using Calcium Imaging and Behavioral Recording in  
610 Zebrafish Larvae. *J. Vis. Exp. JoVE* (2018) doi:10.3791/57485.
- 611 25. Haggerty, D. L., Grecco, G. G., Reeves, K. C. & Atwood, B. Adeno-Associated Viral  
612 Vectors in Neuroscience Research. *Mol. Ther. - Methods Clin. Dev.* **17**, 69–82 (2020).
- 613 26. Chan, K. Y. *et al.* Engineered AAVs for efficient noninvasive gene delivery to the  
614 central and peripheral nervous systems. *Nat. Neurosci.* **20**, 1172–1179 (2017).
- 615 27. Wang, Z. *et al.* Widespread and stable pancreatic gene transfer by adeno-associated  
616 virus vectors via different routes. *Diabetes* **55**, 875–884 (2006).

- 617 28. Jimenez, V. *et al.* In vivo genetic engineering of murine pancreatic beta cells mediated  
618 by single-stranded adeno-associated viral vectors of serotypes 6, 8 and 9. *Diabetologia*  
619 **54**, 1075–1086 (2011).
- 620 29. Mallol, C. *et al.* AAV-mediated pancreatic overexpression of Igf1 counteracts  
621 progression to autoimmune diabetes in mice. *Mol. Metab.* **6**, 664–680 (2017).
- 622 30. Di Cairano, E. S. *et al.* Neurotransmitters and Neuropeptides: New Players in the  
623 Control of Islet of Langerhans' Cell Mass and Function. *J. Cell. Physiol.* **231**, 756–767  
624 (2016).
- 625 31. Gylfe, E. & Tengholm, A. Neurotransmitter control of islet hormone pulsatility.  
626 *Diabetes Obes. Metab.* **16 Suppl 1**, 102–110 (2014).
- 627 32. Ahrén, B. Autonomic regulation of islet hormone secretion - Implications for health  
628 and disease. *Diabetologia* **43**, 393–410 (2000).
- 629 33. Ballian, N. & Brunicardi, F. C. Islet Vasculature as a Regulator of Endocrine Pancreas  
630 Function. *World J. Surg.* **31**, 705–714 (2007).
- 631 34. Colantuoni, A., Bertuglia, S. & Intaglietta, M. The effects of  $\alpha$ - or  $\beta$ -adrenergic  
632 receptor agonists and antagonists and calcium entry blockers on the spontaneous  
633 vasomotion. *Microvasc. Res.* **28**, 143–158 (1984).
- 634 35. Nilsson, H. & Aalkjær, C. Vasomotion: Mechanisms and Physiological Importance.  
635 *Mol. Interv.* **3**, 79 (2003).
- 636 36. Intaglietta, M. Vasomotion and flowmotion: physiological mechanisms and clinical  
637 evidence. *Vasc. Med. Rev.* **vmr-1**, 101–112 (1990).

- 638 37. Morishita, T. & Guth, P. H. Vagal nerve stimulation causes noncholinergic dilatation of  
639 gastric arterioles. *Am. J. Physiol.* **250**, G660-664 (1986).
- 640 38. Legros, G. & Griffith, C. A. The abdominal vagal system in rats. An anatomical study  
641 with emphasis upon the distribution of the gastric vagi to the stomach. *J. Surg. Res.* **9**,  
642 183–186 (1969).
- 643 39. Powley, T. L., Prechtl, J. C., Fox, E. A. & Berthoud, H.-R. Anatomical considerations  
644 for surgery of the rat abdominal vagus: distribution, paraganglia and regeneration. *J.*  
645 *Auton. Nerv. Syst.* **9**, 79–97 (1983).
- 646 40. Ohtani, O., Ushiki, T., Kanazawa, H. & Fujita, T. Microcirculation of the Pancreas in  
647 the Rat and Rabbit with Special Reference to the Insulo-Acinar Portal System and  
648 Emissary Vein of the Islet. *Arch. Histol. Cytol.* **49**, 45–60 (1986).
- 649 41. Looney, M. R. *et al.* Stabilized imaging of immune surveillance in the mouse lung. *Nat.*  
650 *Methods* **8**, 91–96 (2011).
- 651 42. Chen, J. L., Pfäffli, O. A., Voigt, F. F., Margolis, D. J. & Helmchen, F. Online  
652 correction of licking-induced brain motion during two-photon imaging with a tunable  
653 lens. *J. Physiol.* **591**, 4689–4698 (2013).
- 654 43. Schindelin, J. *et al.* Fiji: an open-source platform for biological-image analysis. *Nat.*  
655 *Methods* **9**, 676–682 (2012).
- 656 44. Thévenaz, P., Ruttimann, U. E. & Unser, M. A pyramid approach to subpixel  
657 registration based on intensity. *IEEE Trans. Image Process. Publ. IEEE Signal Process.*  
658 *Soc.* **7**, 27–41 (1998).

- 659 45. Liu, Z. Q. Scale space approach to directional analysis of images. *Appl. Opt.* **30**, 1369–  
660 1373 (1991).  
661

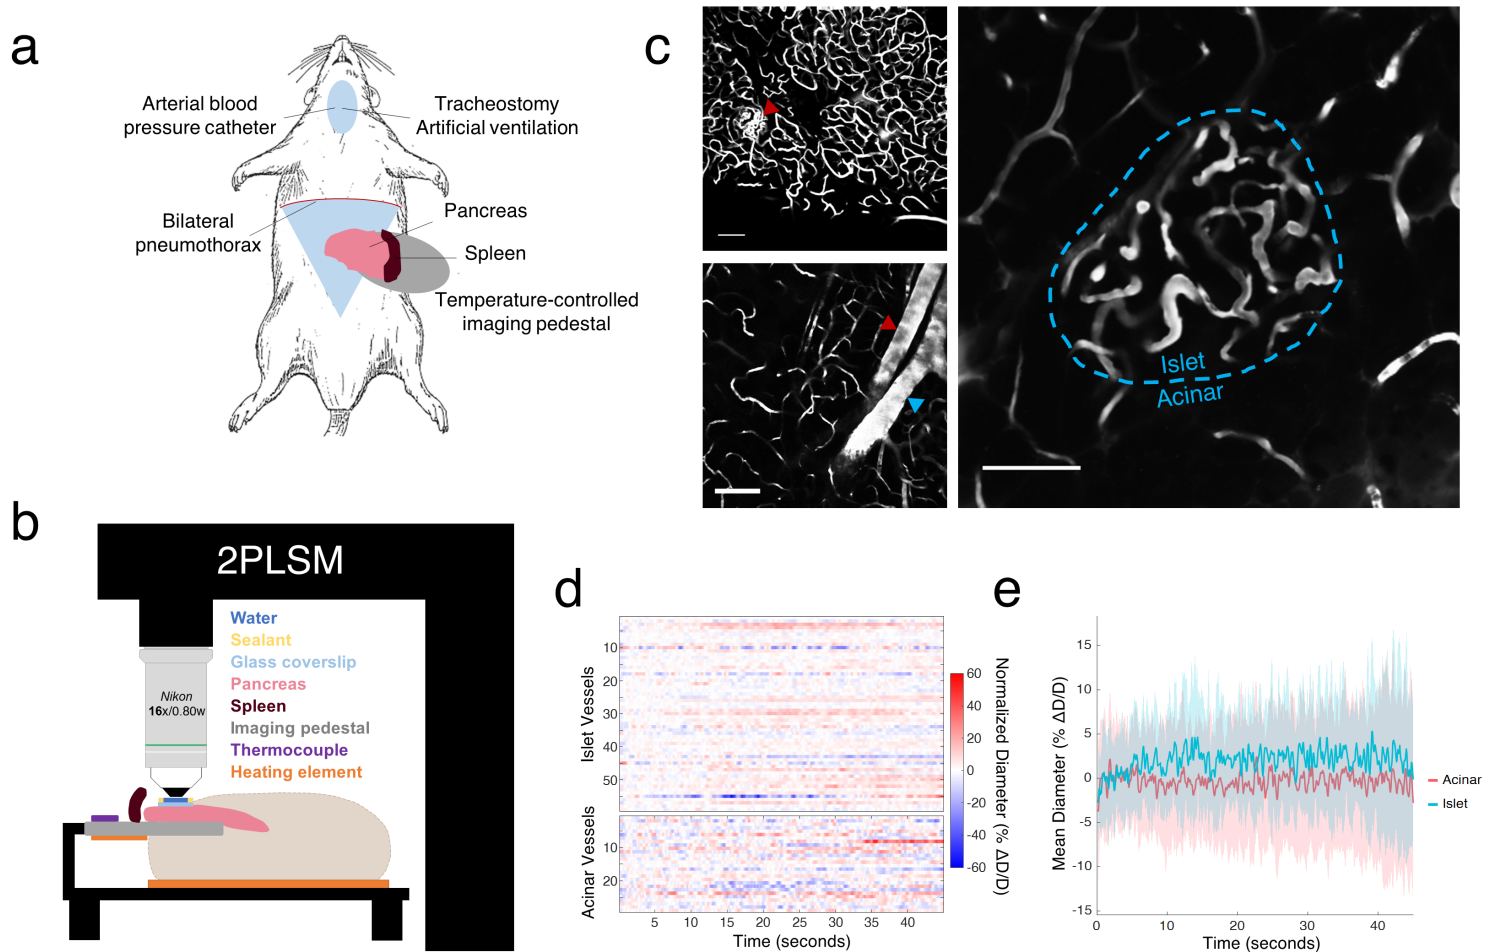

**Figure 1** Overview of surgical preparation and full-frame *in vivo* imaging procedure. A) Main features of surgical preparation. B) Layout of pancreas mounting and optical access to the sample. The pancreas and spleen are sparsely adhered to a heated aluminum imaging pedestal positioned to roughly maintain their original elevation and position. A small round coverslip is placed directly atop a region of pancreatic tail, and a water interface for imaging is created by sealing the coverslip perimeter with Vaseline. All exteriorized abdominal surfaces are covered in soaked gauze and kept moist to prevent fluid loss. C) Appearance of pancreatic microvasculature after i.v. injection of dextran-FITC. Top left, z-projection (40  $\mu$ m) of showing microvascular network from a pancreatic lobule. Islet at red triangle. Bottom left, representative acinar region featuring capillaries and lobular arteriole-venule pair at red and blue triangles, respectively. Right, representative FOV featuring both islet and peri-islet acinar capillaries with border shown in blue. Islets are easily distinguished by their distinct glomerular microvascular morphology.

Scalebars: 100 $\mu$ m. D) Example raster plot of islet and acinar capillary diameters recorded simultaneously, measured from baseline recording. E) Islet and acinar capillary diameter activity are analyzed as separate populations. Baseline mean  $\pm$  SEM from example recording.

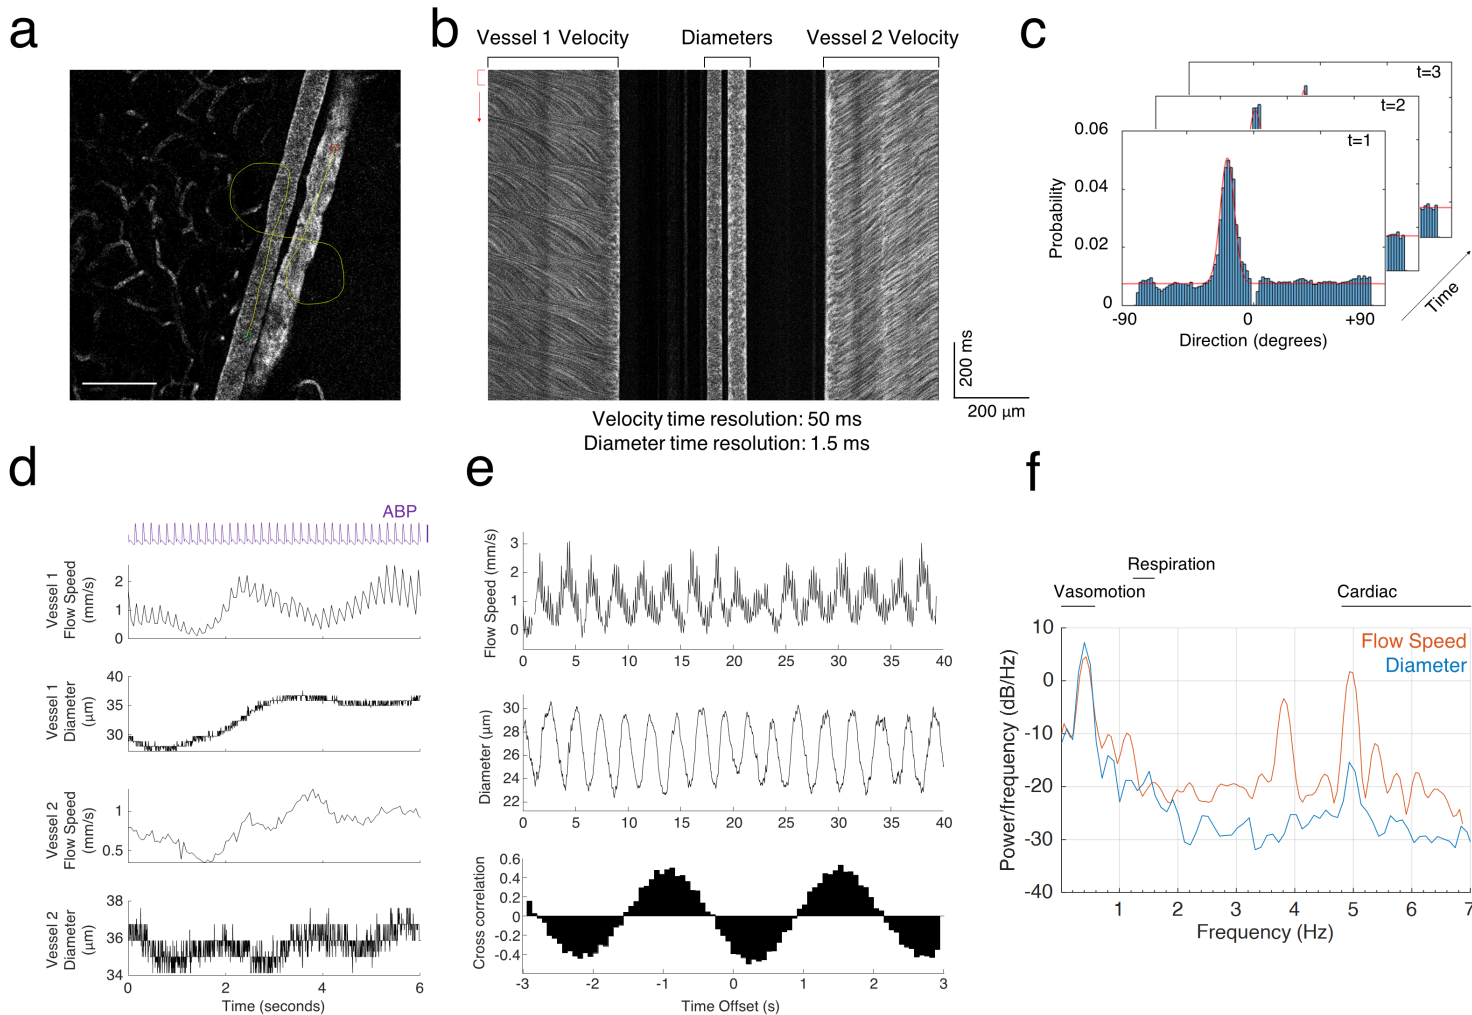

**Figure 2** Overview of linescan imaging and recording features. A) The imaging laser is directed along a freehand path, both along and across microvessels of interest, to respectively capture flow speed and diameter dynamics. The yellow line (start at green, end at red) depicts an example path imaging an arteriole-venule pair. Scalebar, 100  $\mu\text{m}$ . B) Appearance of the resulting linescan collection with columns labeled for their subsequent analysis. Erythrocyte shadows traversing the vessel appear as dark lines with slopes proportional to distance/time, so velocity columns are first windowed (red bracket) and the slope content within each becomes one velocity timepoint. C) Intermediate outputs from the slope detection step. The directional content of each velocity time bin is estimated (see methods), and the resulting histograms are gaussian fit to obtain the peak direction, which is geometrically related to distance/time. D) Resulting flow speed and diameter traces from the vessels in A-B, along with concurrent arterial blood



pressure recording. Putative arterioles (vessel 1) can be identified at this stage by the strong presence of cardiac oscillations in the flow speed along with high degree of diameter flexibility- note the lack of both in vessel 2. ABP scalebar, 50 mmHg. E) Top two, extended baseline linescan recording data from another representative putative arteriole possessing clear vasomotor oscillations in both diameter and flow speed activity. Bottom, cross-correlation can be calculated for flow speed vs diameter showing the phasic relationship between the two. F) Power spectral density estimate for the representative arteriole in E, showing prominent peaks in vasomotor band (slow and fast-wave included, 1-25 cpm). Note the presence of strong cardiac oscillations (275-400 bpm) in the flow speed and lack of respiration (75-100 bpm, locked by ventilator) artifacts.

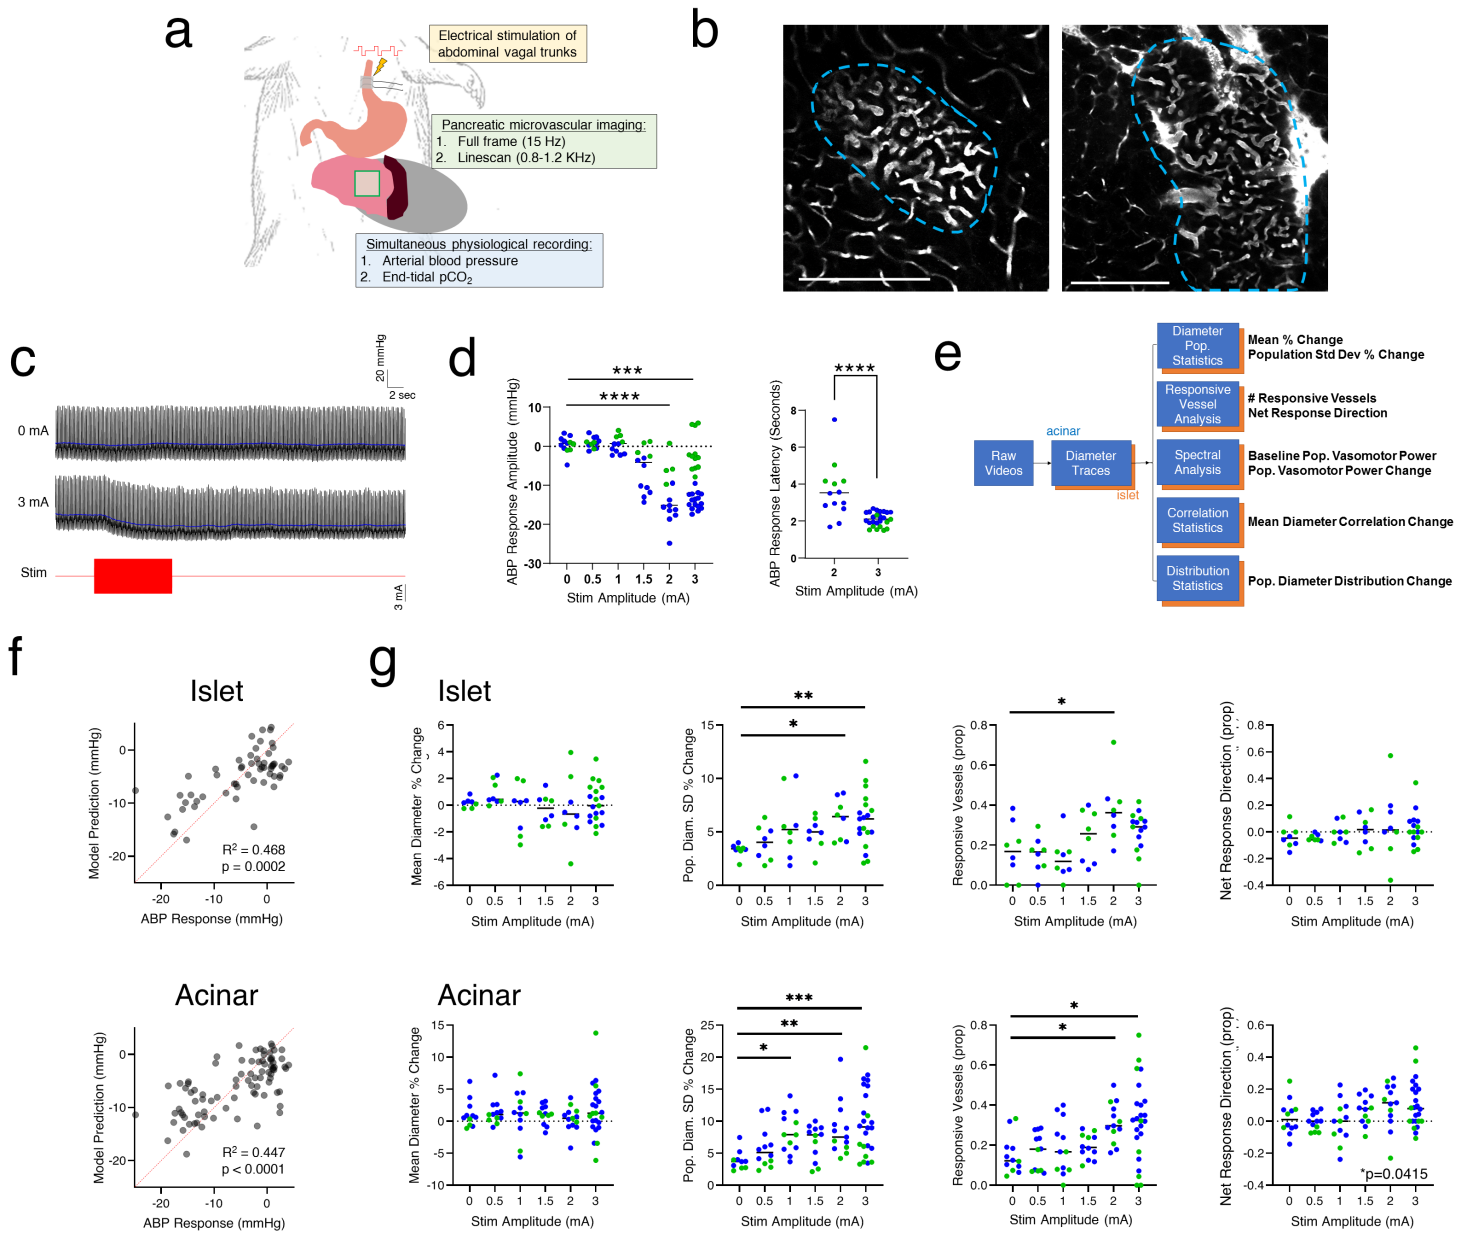

**Figure 3** Abdominal vagus stimulation impacts microvessel diameter dynamics in both islet and acinar compartments. A) Schematic of experiment. The basic procedure in Fig 1A-B is appended with a bipolar cuff electrode implanted on the esophagus to activate both abdominal vagal trunks with biphasic pulse trains (800  $\mu$ s, 50 Hz, 10 second duration) of varied current amplitude (0-3 mA) in repeated, randomized trials. B) Example islet + acinar FOV's analyzed with concurrent stimulation. Islet/acinar border in blue. Scalebar, 200  $\mu$ m. C) Example arterial blood pressure (ABP) waveforms recorded during control (0 mA) and stimulation (3 mA) trials showing drop in systemic blood pressure associated with abdominal

vasodilation following stimulation onset. Blue lines show lowpass-filtered waveform used to determine response amplitude (see methods). D) Left, current amplitudes of 2 mA and above elicited a significant transient drop in ABP following stimulation onset (2mA: n=13, p<0.0001; 3mA: n=28, p=0.0007). Right, Above the ABP response threshold, higher stimulation current led to shorter response latency (Mann-Whitney p<0.0001). E) Overview of processing pipeline and main analysis outputs for full-frame data. Islet and acinar microvessels are analyzed as separate populations and outputs are relative to a five second baseline period included in each recording. F) The microvascular dynamic variables in E can predict the degree of vagal activation indicated by the ABP response, using either acinar or islet microvessel data (p-values are ANOVA versus constant model; stimulation amplitude was also fit with similar results, Supplemental Figure 4). G) Select microvascular population statistics plotted against stimulation amplitude for islet and acinar regions separately. While mean population diameter was unaffected by stimulation (column 1), the variability of diameters (SD % change vs baseline) is significantly increased by high current amplitudes for both islet and acinar capillaries compared to 0 mA trials (column 2). The proportion of vessels that significantly deviate from baseline is also increased among islet and acinar vessels at high current amplitudes (column 3), with only acinar responsive microvessels trending toward vasodilation under these conditions (column 4, acinar Kruskal-Wallis p=0.0415, however no MC-corrected comparisons reach significance). Plots of the remaining outputs from E are shown in Supplemental Figure 5. All points represent single recordings and are colored by experiment where applicable. Horizontal bars denote group median.

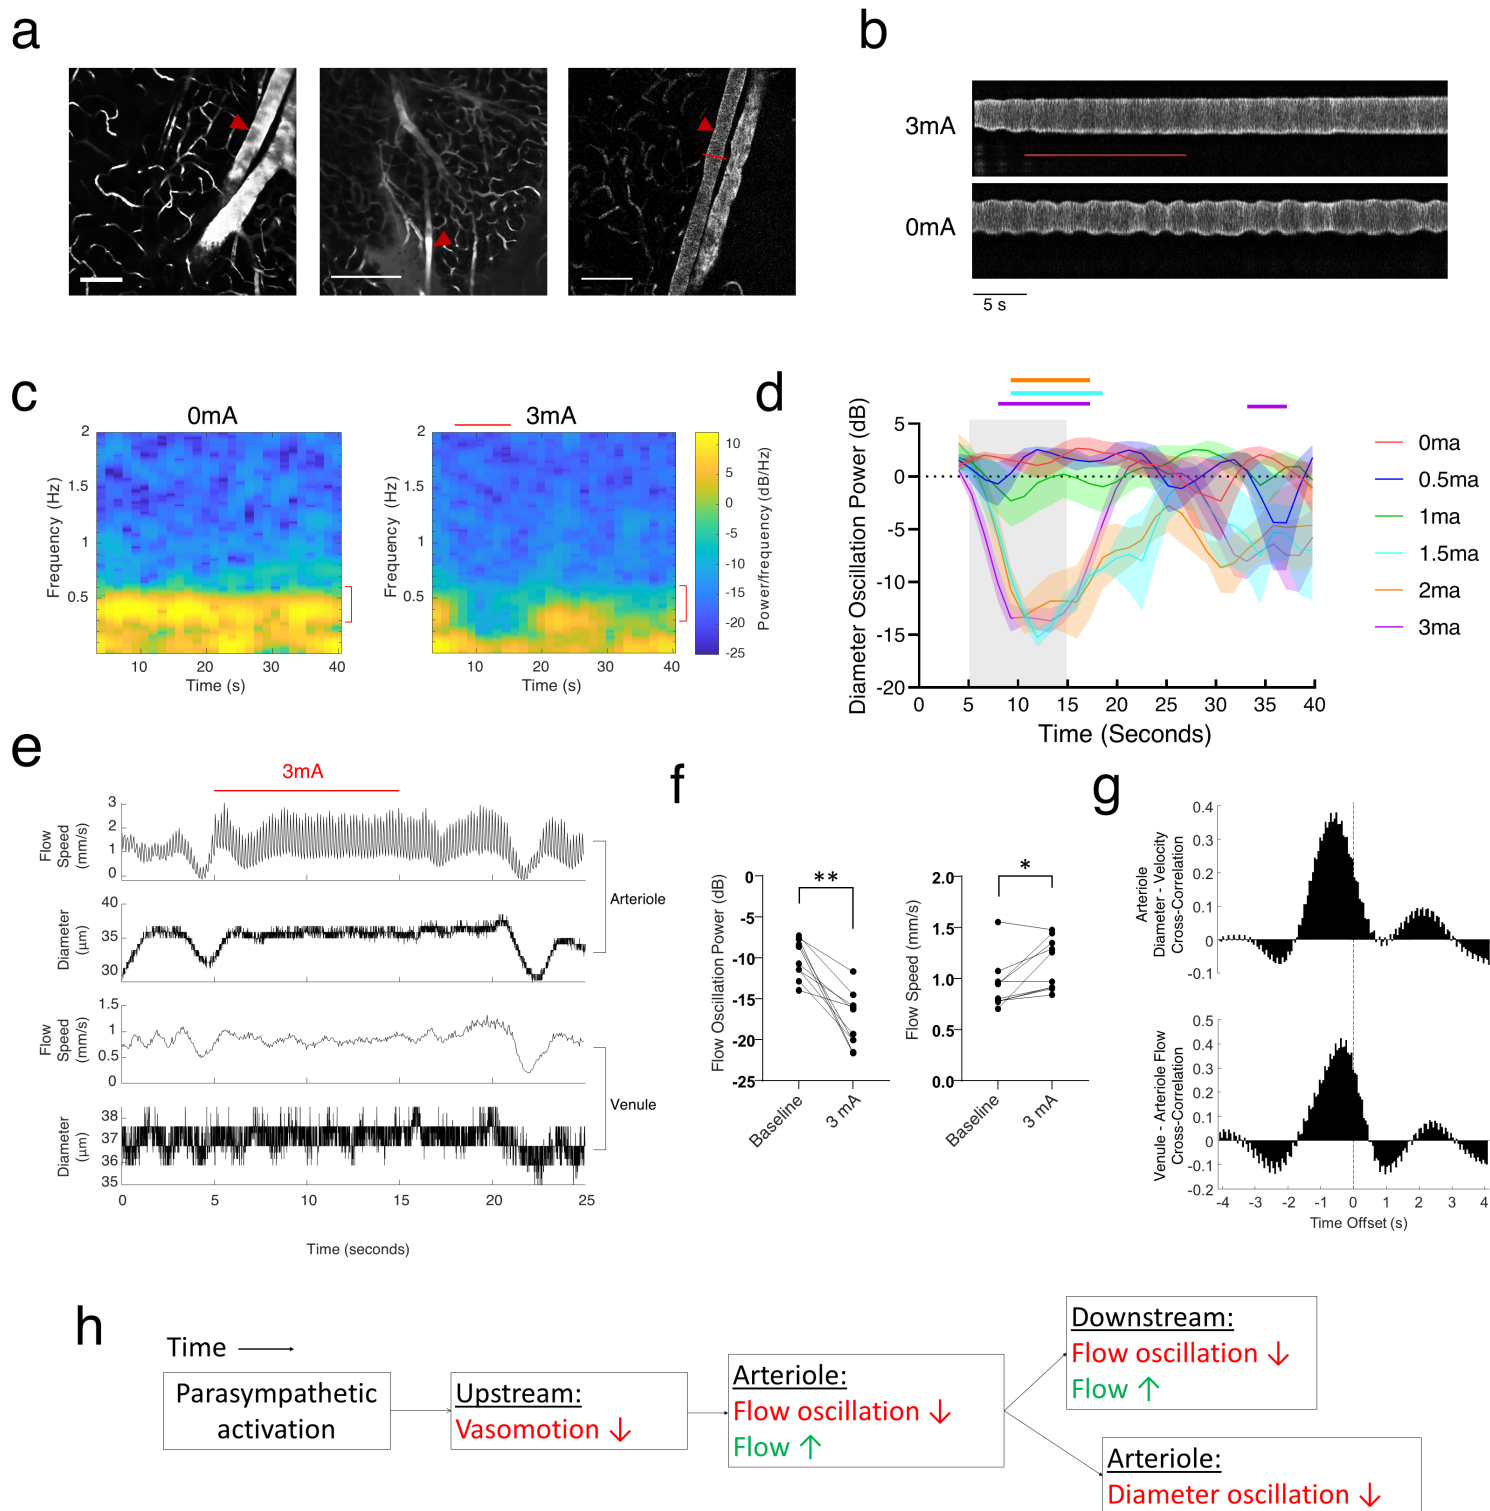

**Figure 4** Vagus stimulation can disrupt traces of microvascular vasomotor oscillation in both diameter and velocity activity. A) Example microvessels with strong diameter oscillations (red triangles) encountered in different animals. The lobular arteriole-venule pair in the rightmost FOV were analyzed as

representative vasomotor vessels in a vagus stimulation experiment (Fig 3A). B) Diameter oscillations exhibited by the arteriole were almost completely disrupted by vagus stimulation (line profile taken from red bar in A; horizontal red line is stimulation period). C) Average spectrograms computed from repeated trials delivering 0 mA (n=4) or 3 mA (n=8, horizontal red line is stimulation period) current amplitude show consistent disruption of diameter oscillations in fast-wave vasomotor band in 3 mA trials (red brackets). D) Diameter vasomotor oscillation power is significantly reduced at current amplitudes  $\geq 1.5$  mA versus 0 mA trials. Traces are mean  $\pm$  SEM from repeated trials. Horizontal colored bars represent timepoints reaching significance criterion ( $p < 0.05$ , multiple t-tests with Holm-Sidak correction). 0-2mA groups all have n=4 replicates, 3mA n=8 replicates. E) Representative linescan recording from the same vessels (Figure 4A, right). Simultaneous measurement of diameter and flow speed show flow speeds are correlated across both vessels and also transiently disrupted by vagus stimulation (red horizontal line). Note the lack of cardiac oscillations in putative venule flow speed as well as stationary diameter compared to putative arteriole. F) Quantification of flow speed responses to repeated trials of vagal stimulation among both vessels. Left, flow speed oscillations were significantly disrupted during stimulation compared to baseline (paired Wilcoxin  $p = 0.0020$ ,  $n = 10$ ) within both vessels. Right, the disruption of oscillations during stimulation were associated with an increase in average flow speed (Wilcoxin  $p = 0.0137$ ,  $n = 10$ ) within both vessels. G) As these disruptions alleviate phase ambiguity, evidence of causal relationships can be obtained by analyzing delays between traces. Top, cross-correlation (average of  $n = 7$  recordings) between arteriole diameter and velocity traces show arteriole diameter lags flow speed by 650 ms. Bottom, venule flow speed lags arteriole flow speed by 250 ms (average of  $n = 7$  recordings). Vertical line denotes no delay. H) Vasomotor response to vagus stimulation findings summarized diagrammatically.
